# Supplementary material for: Antiviral Evaluation of UV-4B and Interferon-Alpha Combination Regimens against Dengue Virus
Source: MDPI journal article supplement (doi:10.3390/v13050771), 2021-04-27
Supplement: s1 [file s1]

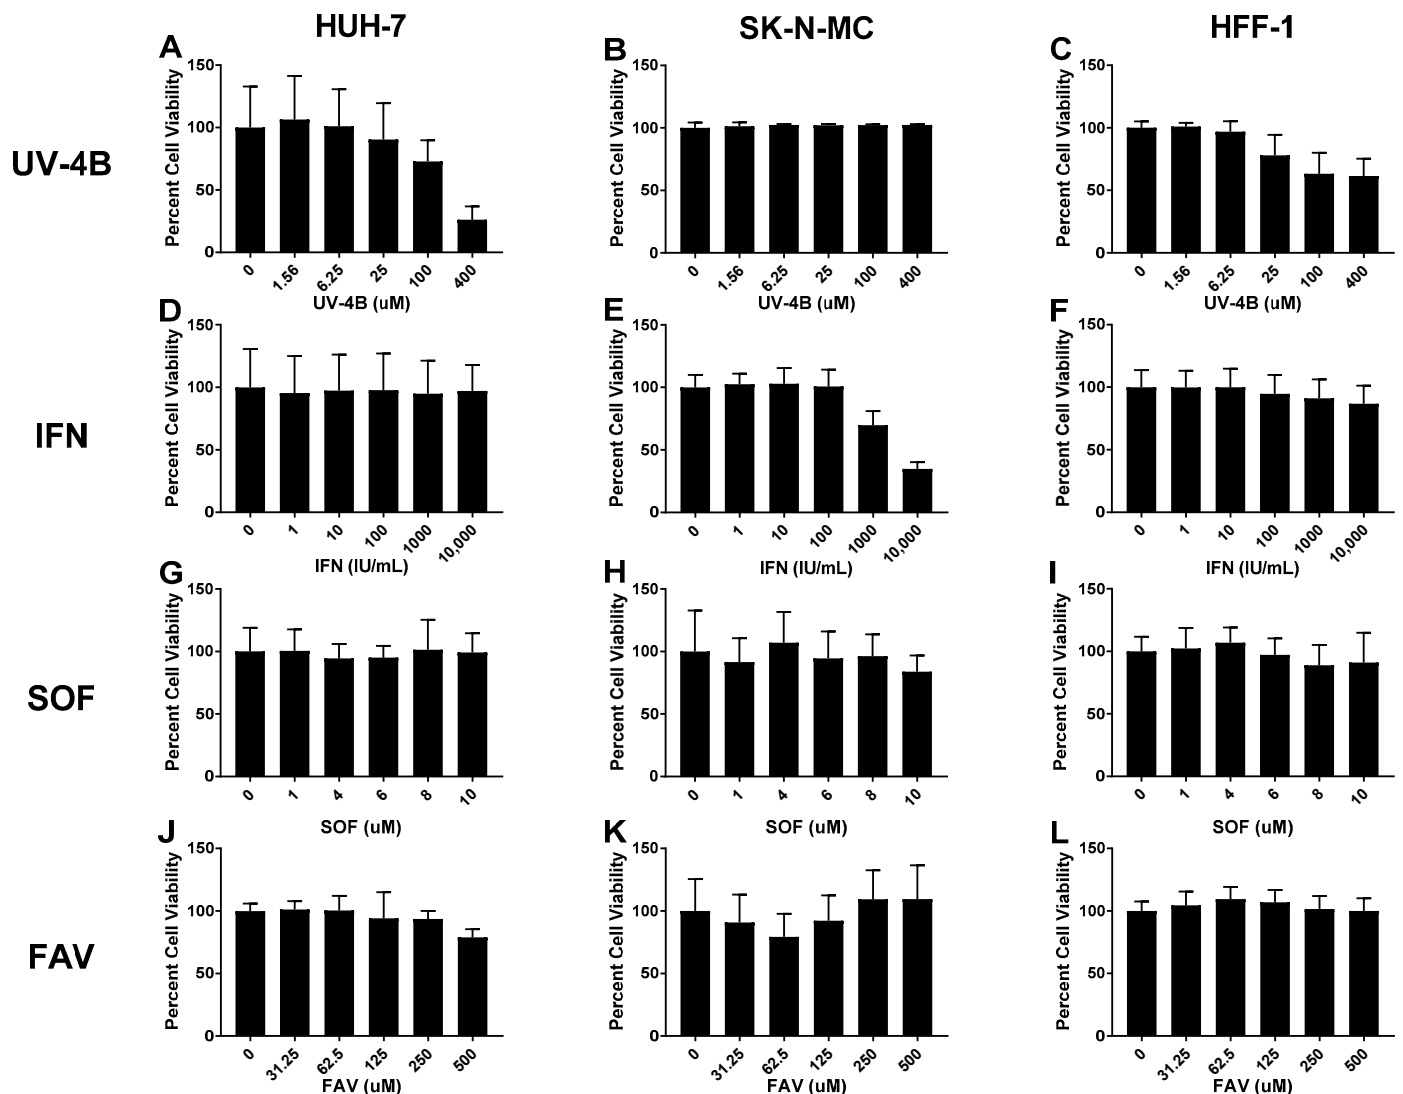

Supplementary Figure 1. The effect of UV-4B (A–C), interferon-alpha (IFN; D–F), sofosbuvir (SOF; G–I), and favipiravir (FAV; J–L) on the viability of uninfected HUH-7, SK-N-MC, and HFF-1 cell lines. Cell viability was measured after three days of drug exposure using the commercially available WST-1 assay kit as per the manufacturer’s instructions. Cell viability is reported as percent cell viability relative to an untreated control. Columns represent the mean of 6 independent samples and error bars correspond to one standard deviation.
